# Supplementary material for: Structure Prediction of Partial-Length Protein Sequences
Source: Int J Mol Sci. 2013 Jul 17;14(7):14892–907. doi: 10.3390/ijms140714892 (PMC3742278; doi:10.3390/ijms140714892)
Supplement: Supplementary file 1 [file ijms-14-14892-s001.pdf]

Supplemental data - table of I-TASSER results for all native and subsequences

|    | Source | Subsequence | Sequence length | Sequence length        | Native  |        | Control |        |
|----|--------|-------------|-----------------|------------------------|---------|--------|---------|--------|
|    | PDB    | position    | (amino acids)   | (proportion of native) | TMscore | MaxSub | TMscore | MaxSub |
| 1  | 1ABA   | 1-55        | 55              | 0.63                   | 0.5869  | 0.5783 | 0.2832  | 0.2782 |
| 2  | 1ABA   | 9-63        | 55              | 0.63                   | 0.6165  | 0.6387 |         |        |
| 3  | 1ABA   | 17-71       | 55              | 0.63                   | 0.6303  | 0.6826 |         |        |
| 4  | 1ABA   | 1-32        | 32              | 0.37                   | 0.4585  | 0.5617 | 0.3725  | 0.4409 |
| 5  | 1ABA   | 9-40        | 32              | 0.37                   | 0.3928  | 0.4346 |         |        |
| 6  | 1ABA   | 17-48       | 32              | 0.37                   | 0.3188  | 0.3825 |         |        |
| 7  | 1ABA   | 25-59       | 35              | 0.4                    | 0.3895  | 0.4296 | 0.1441  | 0.1944 |
| 8  | 1ABA   | 33-67       | 35              | 0.4                    | 0.4412  | 0.5696 |         |        |
| 9  | 1ABA   | 41-75       | 35              | 0.4                    | 0.4078  | 0.4617 |         |        |
| 10 | 1ABA   | 25-79       | 55              | 0.63                   | 0.5973  | 0.6511 | 0.1602  | 0.1496 |
| 11 | 1ABA   | 49-82       | 34              | 0.39                   | 0.2181  | 0.3086 | 0.1706  | 0.2102 |
| 12 | 1ABA   | 49-79       | 31              | 0.36                   | 0.2595  | 0.3538 | 0.1474  | 0.1958 |
| 13 | 1ABA   | Native      | 87              | 1                      | 0.7351  | 0.6991 | 0.1794  | 0.142  |
| 14 | 1G6X   | 1-56        | 56              | 0.97                   | 0.6821  | 0.7233 | 0.2014  | 0.1619 |
| 15 | 1G6X   | 1-45        | 45              | 0.78                   | 0.5418  | 0.6525 | 0.171   | 0.1846 |
| 16 | 1G6X   | 9-53        | 45              | 0.78                   | 0.6274  | 0.7128 |         |        |
| 17 | 1G6X   | 1-41        | 41              | 0.71                   | 0.5654  | 0.6431 | 0.1448  | 0.1706 |
| 18 | 1G6X   | 11-51       | 41              | 0.71                   | 0.5728  | 0.693  |         |        |
| 19 | 1G6X   | 1-43        | 43              | 0.74                   | 0.5657  | 0.6485 | 0.1615  | 0.1748 |
| 20 | 1G6X   | 9-51        | 43              | 0.74                   | 0.5396  | 0.6751 |         |        |
| 21 | 1G6X   | Native      | 58              | 1                      | 0.6394  | 0.678  | 0.1736  | 0.1453 |
| 22 | 1H34   | 1-47        | 47              | 0.82                   | 0.2292  | 0.2352 | 0.1557  | 0.1561 |
| 23 | 1H34   | 9-55        | 47              | 0.82                   | 0.1753  | 0.1846 |         |        |
| 24 | 1H34   | 1-51        | 51              | 0.89                   | 0.1681  | 0.1679 | 0.1705  | 0.1694 |
| 25 | 1H34   | 1-56        | 56              | 0.98                   | 0.1798  | 0.1559 | 0.1467  | 0.1288 |
| 26 | 1H34   | 1-50        | 50              | 0.88                   | 0.2251  | 0.2333 | 0.1549  | 0.1424 |
| 27 | 1H34   | Native      | 57              | 1                      | 0.2026  | 0.1815 | 0.1598  | 0.1425 |
| 28 | 1M1Q   | 1-69        | 69              | 0.77                   | 0.3945  | 0.3582 | 0.2005  | 0.1419 |
| 29 | 1M1Q   | 9-77        | 69              | 0.77                   | 0.3112  | 0.2756 |         |        |
| 30 | 1M1Q   | 17-85       | 69              | 0.77                   | 0.2679  | 0.2251 |         |        |
| 31 | 1M1Q   | 1-66        | 66              | 0.73                   | 0.4014  | 0.3908 | 0.1949  | 0.1732 |
| 32 | 1M1Q   | 9-74        | 66              | 0.73                   | 0.3521  | 0.33   |         |        |
| 33 | 1M1Q   | 17-82       | 66              | 0.73                   | 0.2309  | 0.2044 |         |        |
| 34 | 1M1Q   | 25-65       | 41              | 0.46                   | 0.1793  | 0.2049 | 0.1545  | 0.1732 |
| 35 | 1M1Q   | 33-73       | 41              | 0.46                   | 0.1603  | 0.1954 |         |        |
| 36 | 1M1Q   | 41-81       | 41              | 0.46                   | 0.2093  | 0.2672 |         |        |
| 37 | 1M1Q   | 25-64       | 40              | 0.44                   | 0.2195  | 0.2641 | 0.192   | 0.2395 |
| 38 | 1M1Q   | 33-72       | 40              | 0.44                   | 0.1617  | 0.1962 |         |        |
| 39 | 1M1Q   | 41-80       | 40              | 0.44                   | 0.1992  | 0.2723 |         |        |
| 40 | 1M1Q   | 49-87       | 39              | 0.43                   | 0.1727  | 0.1963 | 0.1854  | 0.2369 |
| 41 | 1M1Q   | 49-88       | 40              | 0.44                   | 0.1874  | 0.2188 | 0.1419  | 0.1677 |
| 42 | 1M1Q   | Native      | 90              | 1                      | 0.1717  | 0.1196 | 0.2076  | 0.1065 |
| 43 | 1NEG   | 1-49        | 49              | 0.75                   | 0.9063  | 0.9553 | 0.163   | 0.1728 |
| 44 | 1NEG   | 9-57        | 49              | 0.75                   | 0.8677  | 0.9339 |         |        |
| 45 | 1NEG   | 1-53        | 53              | 0.82                   | 0.8831  | 0.9333 | 0.1656  | 0.1434 |
| 46 | 1NEG   | 9-61        | 53              | 0.82                   | 0.8386  | 0.8877 |         |        |
| 47 | 1NEG   | 25-65       | 41              | 0.63                   | 0.6686  | 0.7244 | 0.1687  | 0.1864 |
| 48 | 1NEG   | 25-65       | 41              | 0.63                   | 0.6284  | 0.7118 | 0.1684  | 0.1926 |
| 49 | 1NEG   | Native      | 65              | 1                      | 0.843   | 0.8473 | 0.1795  | 0.1392 |
| 50 | 2BK8   | 1-57        | 57              | 0.59                   | 0.5821  | 0.6257 | 0.2348  | 0.2191 |

Supplemental data - table of I-TASSER results for all native and subsequences

|     |      |        |    |      |        |        |        |        |
|-----|------|--------|----|------|--------|--------|--------|--------|
| 51  | 2BK8 | 11-67  | 57 | 0.59 | 0.7995 | 0.8535 |        |        |
| 52  | 2BK8 | 21-77  | 57 | 0.59 | 0.8564 | 0.9127 |        |        |
| 53  | 2BK8 | 1-84   | 84 | 0.87 | 0.8781 | 0.8644 | 0.211  | 0.1207 |
| 54  | 2BK8 | 11-94  | 84 | 0.87 | 0.8687 | 0.8681 |        |        |
| 55  | 2BK8 | 21-72  | 52 | 0.54 | 0.7526 | 0.8397 | 0.1548 | 0.1175 |
| 56  | 2BK8 | 31-82  | 52 | 0.54 | 0.8172 | 0.9038 |        |        |
| 57  | 2BK8 | 41-92  | 52 | 0.54 | 0.8037 | 0.895  |        |        |
| 58  | 2BK8 | 21-77  | 57 | 0.59 | 0.8548 | 0.9112 | 0.1428 | 0.1041 |
| 59  | 2BK8 | 31-87  | 57 | 0.59 | 0.8731 | 0.9255 |        |        |
| 60  | 2BK8 | 41-89  | 49 | 0.51 | 0.8465 | 0.9274 | 0.1617 | 0.1223 |
| 61  | 2BK8 | 41-91  | 51 | 0.53 | 0.7858 | 0.8869 | 0.1656 | 0.1309 |
| 62  | 2BK8 | Native | 97 | 1    | 0.8357 | 0.8079 | 0.2245 | 0.112  |
| 63  | 2NSN | 1-76   | 76 | 0.8  | 0.9058 | 0.9184 | 0.2373 | 0.195  |
| 64  | 2NSN | 9-84   | 76 | 0.8  | 0.8404 | 0.8516 |        |        |
| 65  | 2NSN | 17-92  | 76 | 0.8  | 0.7784 | 0.7817 |        |        |
| 66  | 2NSN | 1-67   | 67 | 0.71 | 0.8927 | 0.9176 | 0.2516 | 0.2202 |
| 67  | 2NSN | 9-75   | 67 | 0.71 | 0.8874 | 0.9208 |        |        |
| 68  | 2NSN | 17-83  | 67 | 0.71 | 0.8543 | 0.877  |        |        |
| 69  | 2NSN | 25-66  | 42 | 0.44 | 0.723  | 0.8812 | 0.2708 | 0.2929 |
| 70  | 2NSN | 33-74  | 42 | 0.44 | 0.6629 | 0.7837 |        |        |
| 71  | 2NSN | 41-82  | 42 | 0.44 | 0.4744 | 0.524  |        |        |
| 72  | 2NSN | 25-86  | 62 | 0.65 | 0.7601 | 0.7871 | 0.2259 | 0.2137 |
| 73  | 2NSN | 33-94  | 62 | 0.65 | 0.6223 | 0.6611 |        |        |
| 74  | 2NSN | 49-94  | 46 | 0.48 | 0.4608 | 0.5023 | 0.2029 | 0.1963 |
| 75  | 2NSN | 49-79  | 31 | 0.33 | 0.5872 | 0.8335 | 0.2679 | 0.3367 |
| 76  | 2NSN | 57-87  | 31 | 0.33 | 0.6663 | 0.8466 |        |        |
| 77  | 2NSN | Native | 95 | 1    | 0.7552 | 0.7365 | 0.2405 | 0.122  |
| 78  | 2Q2F | 1-49   | 49 | 0.68 | 0.584  | 0.5836 | 0.4869 | 0.4759 |
| 79  | 2Q2F | 9-57   | 49 | 0.68 | 0.5682 | 0.5768 |        |        |
| 80  | 2Q2F | 17-65  | 49 | 0.68 | 0.4708 | 0.4974 |        |        |
| 81  | 2Q2F | 1-56   | 56 | 0.78 | 0.6303 | 0.6242 | 0.441  | 0.479  |
| 82  | 2Q2F | 9-64   | 56 | 0.78 | 0.43   | 0.4541 |        |        |
| 83  | 2Q2F | 1-49   | 49 | 0.68 | 0.5863 | 0.5847 | 0.4848 | 0.475  |
| 84  | 2Q2F | 9-57   | 49 | 0.68 | 0.5716 | 0.578  |        |        |
| 85  | 2Q2F | 17-65  | 49 | 0.68 | 0.4719 | 0.4967 |        |        |
| 86  | 2Q2F | 1-68   | 68 | 0.94 | 0.6209 | 0.6116 | 0.5921 | 0.5564 |
| 87  | 2Q2F | 25-67  | 43 | 0.6  | 0.2336 | 0.2311 | 0.4347 | 0.4396 |
| 88  | 2Q2F | 25-66  | 42 | 0.58 | 0.2188 | 0.2185 | 0.3901 | 0.4152 |
| 89  | 2Q2F | 25-71  | 47 | 0.65 | 0.3945 | 0.4236 | 0.4343 | 0.466  |
| 90  | 2Q2F | 25-70  | 46 | 0.64 | 0.4353 | 0.4612 | 0.2419 | 0.2332 |
| 91  | 2Q2F | Native | 72 | 1    | 0.6965 | 0.6879 | 0.6323 | 0.6359 |
| 92  | 3HGL | 1-54   | 54 | 0.69 | 0.3662 | 0.3528 | 0.2778 | 0.2772 |
| 93  | 3HGL | 9-62   | 54 | 0.69 | 0.2093 | 0.1926 |        |        |
| 94  | 3HGL | 17-70  | 54 | 0.69 | 0.3069 | 0.3068 |        |        |
| 95  | 3HGL | 1-54   | 54 | 0.69 | 0.3653 | 0.3523 | 0.2032 | 0.209  |
| 96  | 3HGL | 9-62   | 54 | 0.69 | 0.2093 | 0.1948 |        |        |
| 97  | 3HGL | 17-70  | 54 | 0.69 | 0.307  | 0.307  |        |        |
| 98  | 3HGL | 1-69   | 69 | 0.88 | 0.3031 | 0.2547 | 0.2278 | 0.2165 |
| 99  | 3HGL | 9-77   | 69 | 0.88 | 0.1737 | 0.1412 |        |        |
| 100 | 3HGL | 1-74   | 74 | 0.95 | 0.2911 | 0.2576 | 0.2335 | 0.1471 |
| 101 | 3HGL | 25-67  | 43 | 0.55 | 0.1525 | 0.1817 | 0.1957 | 0.2048 |
| 102 | 3HGL | 33-75  | 43 | 0.55 | 0.1142 | 0.1144 |        |        |

Supplemental data - table of I-TASSER results for all native and subsequences

|     |      |        |    |      |        |        |        |        |
|-----|------|--------|----|------|--------|--------|--------|--------|
| 103 | 3HGL | 25-76  | 52 | 0.67 | 0.2177 | 0.2301 | 0.1979 | 0.213  |
| 104 | 3HGL | 25-73  | 49 | 0.63 | 0.2154 | 0.2186 | 0.1787 | 0.1798 |
| 105 | 3HGL | 25-75  | 51 | 0.65 | 0.2309 | 0.2401 | 0.1533 | 0.1522 |
| 106 | 3HGL | Native | 78 | 1    | 0.3949 | 0.3444 | 0.2188 | 0.154  |
| 107 | 3LLB | 1-80   | 80 | 0.99 | 0.9085 | 0.9158 | 0.1704 | 0.1015 |
| 108 | 3LLB | 1-77   | 77 | 0.95 | 0.8773 | 0.89   | 0.1723 | 0.1238 |
| 109 | 3LLB | 1-77   | 77 | 0.95 | 0.8741 | 0.8891 | 0.1924 | 0.1079 |
| 110 | 3LLB | 1-62   | 62 | 0.77 | 0.8356 | 0.8812 | 0.1788 | 0.1337 |
| 111 | 3LLB | 9-70   | 62 | 0.77 | 0.8278 | 0.8761 |        |        |
| 112 | 3LLB | 17-78  | 62 | 0.77 | 0.8582 | 0.899  |        |        |
| 113 | 3LLB | 25-70  | 46 | 0.57 | 0.739  | 0.8398 | 0.2199 | 0.2434 |
| 114 | 3LLB | 33-78  | 46 | 0.57 | 0.8439 | 0.9261 |        |        |
| 115 | 3LLB | 25-72  | 48 | 0.59 | 0.7276 | 0.8086 | 0.1784 | 0.1688 |
| 116 | 3LLB | 33-80  | 48 | 0.59 | 0.846  | 0.9204 |        |        |
| 117 | 3LLB | 25-74  | 50 | 0.62 | 0.7478 | 0.8055 | 0.1847 | 0.1734 |
| 118 | 3LLB | 25-75  | 51 | 0.63 | 0.7463 | 0.801  | 0.1929 | 0.1585 |
| 119 | 3LLB | 49-78  | 30 | 0.37 | 0.7113 | 0.9369 | 0.1265 | 0.181  |
| 120 | 3LLB | 49-78  | 30 | 0.37 | 0.7099 | 0.9361 | 0.1264 | 0.1811 |
| 121 | 3LLB | Native | 81 | 1    | 0.8853 | 0.8945 | 0.1898 | 0.1237 |
